# Supplementary material
Source: publisher figshare collection journal article supplement (https://acs.figshare.com/ndownloader/files/23306120)

# checkCIF/PLATON report

Structure factors have been supplied for datablock(s) 1

THIS REPORT IS FOR GUIDANCE ONLY. IF USED AS PART OF A REVIEW PROCEDURE FOR PUBLICATION, IT SHOULD NOT REPLACE THE EXPERTISE OF AN EXPERIENCED CRYSTALLOGRAPHIC REFEREE.

No syntax errors found.      CIF dictionary      Interpreting this report

## Datablock: 1

---

|                        |                                            |                                                            |
|------------------------|--------------------------------------------|------------------------------------------------------------|
| Bond precision:        | C-C = 0.0150 Å                             | Wavelength=0.71073                                         |
| Cell:                  | a=14.0505(5)                               | b=14.0505(5)      c=21.0782(8)                             |
|                        | alpha=90                                   | beta=90      gamma=120                                     |
| Temperature:           | 138 K                                      |                                                            |
|                        | Calculated                                 | Reported                                                   |
| Volume                 | 3603.7(3)                                  | 3603.7(3)                                                  |
| Space group            | R 3                                        | R 3                                                        |
| Hall group             | R 3                                        | R 3                                                        |
| Moiety formula         | C27 H55 Ba Br6 N O13 Rb Sb, 0.5(C3 H7 N O) | C15 H31 Ba1 N1 O7, Br6 Sb1, C12 H24 O6 Rb1, 0.5(C3 H7 N O) |
| Sum formula            | C28.50 H58.50 Ba Br6 N1.50 O13.50 Rb Sb    | C28.50 H58.50 Ba Br6 N1.50 O13.50 Rb Sb                    |
| Mr                     | 1462.23                                    | 1462.28                                                    |
| Dx, g cm <sup>-3</sup> | 2.021                                      | 2.021                                                      |
| Z                      | 3                                          | 3                                                          |
| Mu (mm <sup>-1</sup> ) | 7.426                                      | 7.426                                                      |
| F000                   | 2106.0                                     | 2106.0                                                     |
| F000'                  | 2096.63                                    |                                                            |
| h,k,lmax               | 21,21,32                                   | 21,21,31                                                   |
| Nref                   | 5928[ 2964]                                | 5316                                                       |
| Tmin,Tmax              |                                            | 0.912,0.912                                                |
| Tmin'                  |                                            |                                                            |

Correction method= # Reported T Limits: Tmin=0.912 Tmax=0.912  
AbsCorr = SPHERE

Data completeness= 1.79/0.90      Theta(max)= 32.708

R(reflections)= 0.0257( 4697)      wR2(reflections)= 0.0618( 5316)

S = 1.063      Npar= 155

**test-name\_ALERT\_alert-type\_alert-level.**  
Click on the hyperlinks for more details of the test.

PLAT780 ALERT 1 B Coordinates do not Form a Properly Connected Set Please Do !

```

STRVA01_ALERT_4_C          Flack test results are ambiguous.
      From the CIF: _refine_ls_abs_structure_Flack      0.390
      From the CIF: _refine_ls_abs_structure_Flack_su    0.010
PLAT077_ALERT_4_C Unitcell Contains Non-integer Number of Atoms ..      Please Check
PLAT242_ALERT_2_C Low      'MainMol' Ueq as Compared to Neighbors of      Bal Check
PLAT242_ALERT_2_C Low      'MainMol' Ueq as Compared to Neighbors of      Rbl Check
PLAT342_ALERT_3_C Low Bond Precision on C-C Bonds .....      0.015 Ang.

```

|                   |                                                  |        |              |
|-------------------|--------------------------------------------------|--------|--------------|
| PLAT004_ALERT_5_G | Polymeric Structure Found with Maximum Dimension | 3      | Info         |
| PLAT033_ALERT_4_G | Flack x Value Deviates > 3.0 * sigma from Zero . | 0.390  | Note         |
| PLAT042_ALERT_1_G | Calc. and Reported MoietyFormula Strings Differ  |        | Please Check |
| PLAT083_ALERT_2_G | SHELXL Second Parameter in WGHT Unusually Large  | 7.99   | Why ?        |
| PLAT171_ALERT_4_G | The CIF-Embedded .res File Contains EADP Records | 1      | Report       |
| PLAT232_ALERT_2_G | Hirshfeld Test Diff (M-X) Sb1 --Br1 .            | 19.6   | s.u.         |
| PLAT232_ALERT_2_G | Hirshfeld Test Diff (M-X) Sb1 --Br2 .            | 23.0   | s.u.         |
| PLAT300_ALERT_4_G | Atom Site Occupancy of O5 Constrained at         | 0.3333 | Check        |
| PLAT300_ALERT_4_G | Atom Site Occupancy of N1 Constrained at         | 0.3333 | Check        |
| PLAT300_ALERT_4_G | Atom Site Occupancy of C9 Constrained at         | 0.3333 | Check        |
| PLAT300_ALERT_4_G | Atom Site Occupancy of C10 Constrained at        | 0.3333 | Check        |
| PLAT300_ALERT_4_G | Atom Site Occupancy of C11 Constrained at        | 0.3333 | Check        |
| PLAT300_ALERT_4_G | Atom Site Occupancy of H9 Constrained at         | 0.3333 | Check        |
| PLAT300_ALERT_4_G | Atom Site Occupancy of H10A Constrained at       | 0.3333 | Check        |
| PLAT300_ALERT_4_G | Atom Site Occupancy of H10B Constrained at       | 0.3333 | Check        |
| PLAT300_ALERT_4_G | Atom Site Occupancy of H10C Constrained at       | 0.3333 | Check        |
| PLAT300_ALERT_4_G | Atom Site Occupancy of H11A Constrained at       | 0.3333 | Check        |
| PLAT300_ALERT_4_G | Atom Site Occupancy of H11B Constrained at       | 0.3333 | Check        |
| PLAT300_ALERT_4_G | Atom Site Occupancy of H11C Constrained at       | 0.3333 | Check        |
| PLAT300_ALERT_4_G | Atom Site Occupancy of O6 Constrained at         | 0.1667 | Check        |
| PLAT300_ALERT_4_G | Atom Site Occupancy of N2 Constrained at         | 0.1667 | Check        |
| PLAT300_ALERT_4_G | Atom Site Occupancy of C12 Constrained at        | 0.1667 | Check        |
| PLAT300_ALERT_4_G | Atom Site Occupancy of C13 Constrained at        | 0.1667 | Check        |
| PLAT300_ALERT_4_G | Atom Site Occupancy of C14 Constrained at        | 0.1667 | Check        |
| PLAT300_ALERT_4_G | Atom Site Occupancy of H12 Constrained at        | 0.1667 | Check        |
| PLAT300_ALERT_4_G | Atom Site Occupancy of H13A Constrained at       | 0.1667 | Check        |
| PLAT300_ALERT_4_G | Atom Site Occupancy of H13B Constrained at       | 0.1667 | Check        |
| PLAT300_ALERT_4_G | Atom Site Occupancy of H13C Constrained at       | 0.1667 | Check        |
| PLAT300_ALERT_4_G | Atom Site Occupancy of H14A Constrained at       | 0.1667 | Check        |
| PLAT300_ALERT_4_G | Atom Site Occupancy of H14B Constrained at       | 0.1667 | Check        |
| PLAT300_ALERT_4_G | Atom Site Occupancy of H14C Constrained at       | 0.1667 | Check        |
| PLAT301_ALERT_3_G | Main Residue Disorder .....(Resd 1 )             | 9%     | Note         |
| PLAT302_ALERT_4_G | Anion/Solvent/Minor-Residue Disorder (Resd 2 )   | 100%   | Note         |
| PLAT412_ALERT_2_G | Short Intra XH3 .. XHn H6A ..H10B .              | 2.01   | Ang.         |
|                   | 1/3-x+y,2/3-x,-1/3+z =                           | 9_554  | Check        |
| PLAT413_ALERT_2_G | Short Inter XH3 .. XHn H2A ..H14B .              | 1.97   | Ang.         |
|                   | 4/3-x+y,5/3-x,-1/3+z =                           | 9_664  | Check        |
| PLAT413_ALERT_2_G | Short Inter XH3 .. XHn H2B ..H13B .              | 1.82   | Ang.         |
|                   | 4/3-y,2/3+x-y,-1/3+z =                           | 8_654  | Check        |
| PLAT413_ALERT_2_G | Short Inter XH3 .. XHn H5A ..H13C .              | 2.05   | Ang.         |

|                   |                                                  |       |       |
|-------------------|--------------------------------------------------|-------|-------|
|                   | 4/3-y,2/3+x-y,-1/3+z =                           | 8_654 | Check |
| PLAT413_ALERT_2_G | Short Inter XH3 .. XHn H5B ..H13C .              | 1.95  | Ang.  |
|                   | 4/3-y,2/3+x-y,-1/3+z =                           | 8_654 | Check |
| PLAT789_ALERT_4_G | Atoms with Negative _atom_site_disorder_group #  | 24    | Check |
| PLAT794_ALERT_5_G | Tentative Bond Valency for Sb1 (III) .           | 2.76  | Info  |
| PLAT870_ALERT_4_G | ALERTS Related to Twinning Effects Suppressed .. | !     | Info  |
| PLAT912_ALERT_4_G | Missing # of FCF Reflections Above STh/L= 0.600  | 174   | Note  |
| PLAT933_ALERT_2_G | Number of OMIT Records in Embedded .res File ... | 2     | Note  |

---

0 **ALERT level A** = Most likely a serious problem - resolve or explain  
 1 **ALERT level B** = A potentially serious problem, consider carefully  
 5 **ALERT level C** = Check. Ensure it is not caused by an omission or oversight  
 43 **ALERT level G** = General information/check it is not something unexpected

2 ALERT type 1 CIF construction/syntax error, inconsistent or missing data  
 11 ALERT type 2 Indicator that the structure model may be wrong or deficient  
 2 ALERT type 3 Indicator that the structure quality may be low  
 32 ALERT type 4 Improvement, methodology, query or suggestion  
 2 ALERT type 5 Informative message, check

---

It is advisable to attempt to resolve as many as possible of the alerts in all categories. Often the minor alerts point to easily fixed oversights, errors and omissions in your CIF or refinement strategy, so attention to these fine details can be worthwhile. In order to resolve some of the more serious problems it may be necessary to carry out additional measurements or structure refinements. However, the purpose of your study may justify the reported deviations and the more serious of these should normally be commented upon in the discussion or experimental section of a paper or in the "special\_details" fields of the CIF. checkCIF was carefully designed to identify outliers and unusual parameters, but every test has its limitations and alerts that are not important in a particular case may appear. Conversely, the absence of alerts does not guarantee there are no aspects of the results needing attention. It is up to the individual to critically assess their own results and, if necessary, seek expert advice.

### Publication of your CIF in IUCr journals

A basic structural check has been run on your CIF. These basic checks will be run on all CIFs submitted for publication in IUCr journals (*Acta Crystallographica*, *Journal of Applied Crystallography*, *Journal of Synchrotron Radiation*); however, if you intend to submit to *Acta Crystallographica Section C* or *E* or *IUCrData*, you should make sure that full publication checks are run on the final version of your CIF prior to submission.

### Publication of your CIF in other journals

Please refer to the *Notes for Authors* of the relevant journal for any special instructions relating to CIF submission.

---

**PLATON version of 22/04/2020; check.def file version of 09/03/2020**

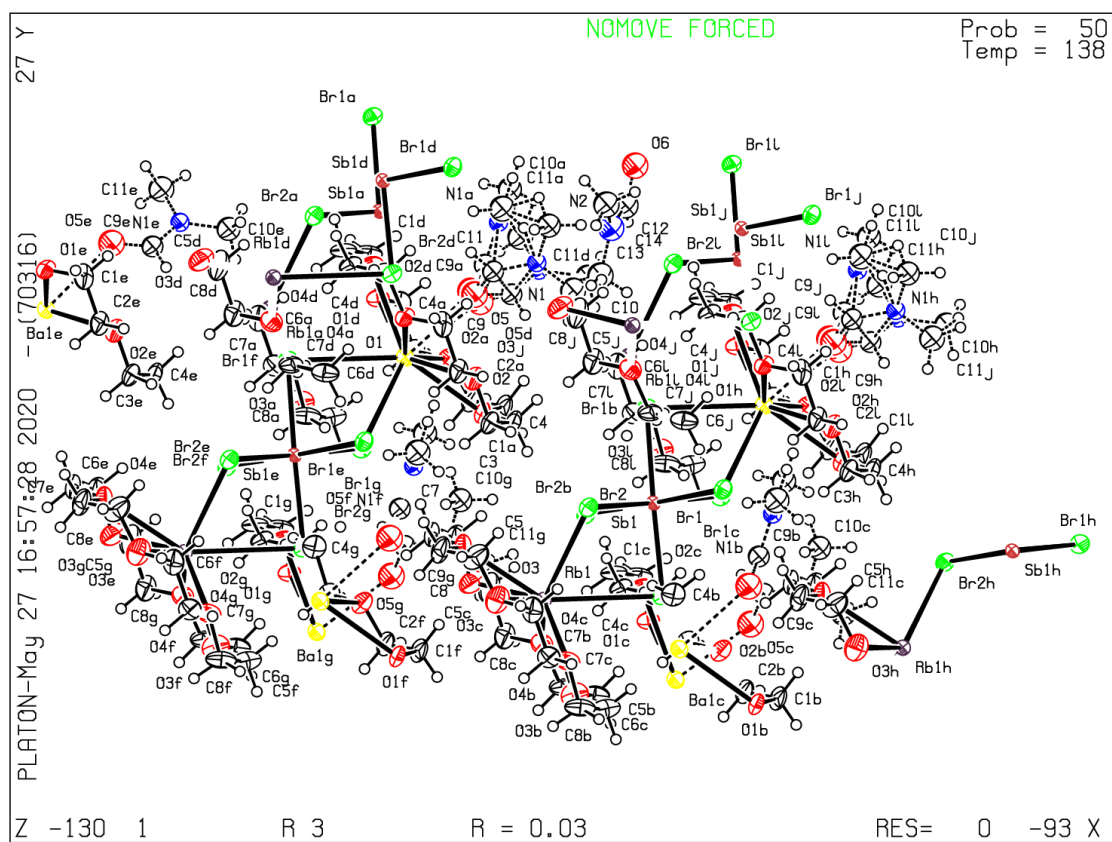

Supplement: Supplementary file 3 [file 23306120]
