# Supplementary material
Source: publisher figshare collection journal article supplement (https://acs.figshare.com/ndownloader/files/23306120)

# checkCIF/PLATON report

Structure factors have been supplied for datablock(s) 1

THIS REPORT IS FOR GUIDANCE ONLY. IF USED AS PART OF A REVIEW PROCEDURE FOR PUBLICATION, IT SHOULD NOT REPLACE THE EXPERTISE OF AN EXPERIENCED CRYSTALLOGRAPHIC REFEREE.

No syntax errors found.      CIF dictionary      Interpreting this report

## Datablock: 1

---

Bond precision:    C-C = 0.0100 Å

Wavelength=0.71073

Cell:                    a=8.9339(2)                    b=13.8500(4)                    c=24.0142(7)  
                          alpha=80.825(2)                    beta=86.605(2)                    gamma=89.767(2)  
Temperature:    200 K

|                        | Calculated                                                      | Reported                                              |
|------------------------|-----------------------------------------------------------------|-------------------------------------------------------|
| Volume                 | 2928.18(14)                                                     | 2928.18(14)                                           |
| Space group            | P -1                                                            | P -1                                                  |
| Hall group             | -P 1                                                            | -P 1                                                  |
| Moiety formula         | 2(C30 H62 Ba2 Br6 N2 O14 Sb), 2(C1.50 H3.50 Br4 N0.50 O0.50 Sb) | C30 H62 Ba2 Br6 N2 O14 Sb, C1.5 H3.5 Br4 N0.5 O0.5 Sb |
| Sum formula            | C63 H131 Ba4 Br20 N5 O29 Sb4                                    | C31.50 H65.50 Ba2 Br10 N2.50 O14.50 Sb2               |
| Mr                     | 4057.09                                                         | 2028.64                                               |
| Dx, g cm <sup>-3</sup> | 2.301                                                           | 2.301                                                 |
| Z                      | 1                                                               | 2                                                     |
| Mu (mm <sup>-1</sup> ) | 9.116                                                           | 9.116                                                 |
| F000                   | 1904.0                                                          | 1904.0                                                |
| F000'                  | 1895.92                                                         |                                                       |
| h,k,lmax               | 12,19,34                                                        | 12,19,34                                              |
| Nref                   | 17899                                                           | 17895                                                 |
| Tmin,Tmax              |                                                                 | 0.610,0.619                                           |
| Tmin'                  |                                                                 |                                                       |

Correction method= # Reported T Limits: Tmin=0.610 Tmax=0.619  
AbsCorr = SPHERE

Data completeness= 1.000

Theta(max)= 30.508

R(reflections)= 0.0503( 11836)

wR2(reflections)= 0.1160( 17895)

S = 1.023

Npar= 496

---

The following ALERTS were generated. Each ALERT has the format

**test-name\_ALERT\_alert-type\_alert-level.**

Click on the hyperlinks for more details of the test.

---

● **Alert level B**

|                   |                                                |      |        |
|-------------------|------------------------------------------------|------|--------|
| PLAT201_ALERT_2_B | Isotropic non-H Atoms in Main Residue(s) ..... | 10   | Report |
|                   | 013 014 N1 N2 C25 C26                          |      | etc.   |
| PLAT220_ALERT_2_B | NonSolvent Resd 1 C Ueq(max) / Ueq(min) Range  | 9.4  | Ratio  |
| PLAT971_ALERT_2_B | Check Calcd Resid. Dens. 1.05A From Br7        | 2.71 | eA-3   |

---

● **Alert level C**

|                   |                                                 |       |       |
|-------------------|-------------------------------------------------|-------|-------|
| PLAT222_ALERT_3_C | NonSolvent Resd 1 H Uiso(max)/Uiso(min) Range   | 10.0  | Ratio |
| PLAT244_ALERT_4_C | Low 'Solvent' Ueq as Compared to Neighbors of   | Sb2   | Check |
| PLAT342_ALERT_3_C | Low Bond Precision on C-C Bonds .....           | 0.01  | Ang.  |
| PLAT906_ALERT_3_C | Large K Value in the Analysis of Variance ..... | 4.461 | Check |
| PLAT971_ALERT_2_C | Check Calcd Resid. Dens. 0.89A From Sb2         | 1.79  | eA-3  |
| PLAT971_ALERT_2_C | Check Calcd Resid. Dens. 0.85A From Br7         | 1.71  | eA-3  |
| PLAT971_ALERT_2_C | Check Calcd Resid. Dens. 0.33A From Br8         | 1.69  | eA-3  |
| PLAT971_ALERT_2_C | Check Calcd Resid. Dens. 0.93A From Br8         | 1.61  | eA-3  |
| PLAT972_ALERT_2_C | Check Calcd Resid. Dens. 0.78A From Br7         | -2.21 | eA-3  |
| PLAT972_ALERT_2_C | Check Calcd Resid. Dens. 0.39A From Br8         | -2.07 | eA-3  |
| PLAT972_ALERT_2_C | Check Calcd Resid. Dens. 0.66A From Br7         | -1.87 | eA-3  |
| PLAT972_ALERT_2_C | Check Calcd Resid. Dens. 0.57A From Br7         | -1.83 | eA-3  |
| PLAT972_ALERT_2_C | Check Calcd Resid. Dens. 0.82A From Br8         | -1.70 | eA-3  |
| PLAT972_ALERT_2_C | Check Calcd Resid. Dens. 0.60A From Sb2         | -1.59 | eA-3  |
| PLAT972_ALERT_2_C | Check Calcd Resid. Dens. 0.44A From Br8         | -1.59 | eA-3  |
| PLAT972_ALERT_2_C | Check Calcd Resid. Dens. 0.69A From Br8         | -1.53 | eA-3  |
| PLAT973_ALERT_2_C | Check Calcd Positive Resid. Density on Ba2      | 1.15  | eA-3  |
| PLAT973_ALERT_2_C | Check Calcd Positive Resid. Density on Sb1      | 1.15  | eA-3  |
| PLAT973_ALERT_2_C | Check Calcd Positive Resid. Density on Ba1      | 1.01  | eA-3  |
| PLAT977_ALERT_2_C | Check Negative Difference Density on H24B       | -0.32 | eA-3  |
| PLAT977_ALERT_2_C | Check Negative Difference Density on H30A       | -0.34 | eA-3  |
| PLAT977_ALERT_2_C | Check Negative Difference Density on H27D       | -0.31 | eA-3  |
| PLAT977_ALERT_2_C | Check Negative Difference Density on H30D       | -0.51 | eA-3  |

---

● **Alert level G**

|                   |                                                  |        |        |
|-------------------|--------------------------------------------------|--------|--------|
| PLAT042_ALERT_1_G | Calc. and Reported MoietyFormula Strings Differ  | Please | Check  |
| PLAT045_ALERT_1_G | Calculated and Reported Z Differ by a Factor ... | 0.50   | Check  |
| PLAT083_ALERT_2_G | SHELXL Second Parameter in WGHT Unusually Large  | 5.14   | Why ?  |
| PLAT154_ALERT_1_G | The s.u.'s on the Cell Angles are Equal ..(Note) | 0.002  | Degree |
| PLAT171_ALERT_4_G | The CIF-Embedded .res File Contains EADP Records | 8      | Report |
| PLAT232_ALERT_2_G | Hirshfeld Test Diff (M-X) Sb1 --Br1 .            | 19.7   | s.u.   |
| PLAT232_ALERT_2_G | Hirshfeld Test Diff (M-X) Sb1 --Br2 .            | 20.0   | s.u.   |
| PLAT232_ALERT_2_G | Hirshfeld Test Diff (M-X) Sb1 --Br3 .            | 8.3    | s.u.   |
| PLAT232_ALERT_2_G | Hirshfeld Test Diff (M-X) Sb1 --Br4 .            | 6.7    | s.u.   |
| PLAT232_ALERT_2_G | Hirshfeld Test Diff (M-X) Sb1 --Br6 .            | 6.7    | s.u.   |
| PLAT300_ALERT_4_G | Atom Site Occupancy of O15 Constrained at        | 0.5    | Check  |
| PLAT300_ALERT_4_G | Atom Site Occupancy of N3 Constrained at         | 0.5    | Check  |
| PLAT300_ALERT_4_G | Atom Site Occupancy of C31 Constrained at        | 0.5    | Check  |
| PLAT300_ALERT_4_G | Atom Site Occupancy of C32 Constrained at        | 0.5    | Check  |
| PLAT300_ALERT_4_G | Atom Site Occupancy of C33 Constrained at        | 0.5    | Check  |
| PLAT300_ALERT_4_G | Atom Site Occupancy of H31 Constrained at        | 0.5    | Check  |
| PLAT300_ALERT_4_G | Atom Site Occupancy of H32A Constrained at       | 0.5    | Check  |
| PLAT300_ALERT_4_G | Atom Site Occupancy of H32B Constrained at       | 0.5    | Check  |
| PLAT300_ALERT_4_G | Atom Site Occupancy of H32C Constrained at       | 0.5    | Check  |
| PLAT300_ALERT_4_G | Atom Site Occupancy of H33A Constrained at       | 0.5    | Check  |
| PLAT300_ALERT_4_G | Atom Site Occupancy of H33B Constrained at       | 0.5    | Check  |

|                   |                                                  |                             |      |       |
|-------------------|--------------------------------------------------|-----------------------------|------|-------|
| PLAT300_ALERT_4_G | Atom Site Occupancy of H33C                      | Constrained at              | 0.5  | Check |
| PLAT301_ALERT_3_G | Main Residue Disorder .....                      | (Resd 1 )                   | 18%  | Note  |
| PLAT302_ALERT_4_G | Anion/Solvent/Minor-Residue Disorder             | (Resd 2 )                   | 33%  | Note  |
| PLAT380_ALERT_4_G | Incorrectly? Oriented X(sp2)-Methyl Moiety       | .....                       | C26  | Check |
| PLAT380_ALERT_4_G | Incorrectly? Oriented X(sp2)-Methyl Moiety       | .....                       | C27  | Check |
| PLAT380_ALERT_4_G | Incorrectly? Oriented X(sp2)-Methyl Moiety       | .....                       | C29  | Check |
| PLAT380_ALERT_4_G | Incorrectly? Oriented X(sp2)-Methyl Moiety       | .....                       | C30  | Check |
| PLAT380_ALERT_4_G | Incorrectly? Oriented X(sp2)-Methyl Moiety       | .....                       | C32  | Check |
| PLAT380_ALERT_4_G | Incorrectly? Oriented X(sp2)-Methyl Moiety       | .....                       | C33  | Check |
| PLAT721_ALERT_1_G | Bond Calc                                        | 0.97000, Rep 0.96000 Dev... | 0.01 | Ang.  |
|                   | C27A -H27E                                       | 1.555 1.555 .....           | # 73 | Check |
| PLAT789_ALERT_4_G | Atoms with Negative _atom_site_disorder_group    | #                           | 60   | Check |
| PLAT794_ALERT_5_G | Tentative Bond Valency for Sb1                   | (III) .                     | 2.83 | Info  |
| PLAT802_ALERT_4_G | CIF Input Record(s) with more than 80 Characters |                             | 1    | Info  |
| PLAT910_ALERT_3_G | Missing # of FCF Reflection(s) Below Theta(Min). |                             | 3    | Note  |
| PLAT912_ALERT_4_G | Missing # of FCF Reflections Above STh/L=        | 0.600                       | 1    | Note  |
| PLAT941_ALERT_3_G | Average HKL Measurement Multiplicity .....       |                             | 3.4  | Low   |
| PLAT978_ALERT_2_G | Number C-C Bonds with Positive Residual Density. |                             | 0    | Info  |

---

0 **ALERT level A** = Most likely a serious problem - resolve or explain  
 3 **ALERT level B** = A potentially serious problem, consider carefully  
 23 **ALERT level C** = Check. Ensure it is not caused by an omission or oversight  
 38 **ALERT level G** = General information/check it is not something unexpected

4 ALERT type 1 CIF construction/syntax error, inconsistent or missing data  
 29 ALERT type 2 Indicator that the structure model may be wrong or deficient  
 6 ALERT type 3 Indicator that the structure quality may be low  
 24 ALERT type 4 Improvement, methodology, query or suggestion  
 1 ALERT type 5 Informative message, check

---



---

It is advisable to attempt to resolve as many as possible of the alerts in all categories. Often the minor alerts point to easily fixed oversights, errors and omissions in your CIF or refinement strategy, so attention to these fine details can be worthwhile. In order to resolve some of the more serious problems it may be necessary to carry out additional measurements or structure refinements. However, the purpose of your study may justify the reported deviations and the more serious of these should normally be commented upon in the discussion or experimental section of a paper or in the "special\_details" fields of the CIF. checkCIF was carefully designed to identify outliers and unusual parameters, but every test has its limitations and alerts that are not important in a particular case may appear. Conversely, the absence of alerts does not guarantee there are no aspects of the results needing attention. It is up to the individual to critically assess their own results and, if necessary, seek expert advice.

### **Publication of your CIF in IUCr journals**

A basic structural check has been run on your CIF. These basic checks will be run on all CIFs submitted for publication in IUCr journals (*Acta Crystallographica*, *Journal of Applied Crystallography*, *Journal of Synchrotron Radiation*); however, if you intend to submit to *Acta Crystallographica Section C* or *E* or *IUCrData*, you should make sure that full publication checks are run on the final version of your CIF prior to submission.

### **Publication of your CIF in other journals**

Please refer to the *Notes for Authors* of the relevant journal for any special instructions relating to CIF submission.

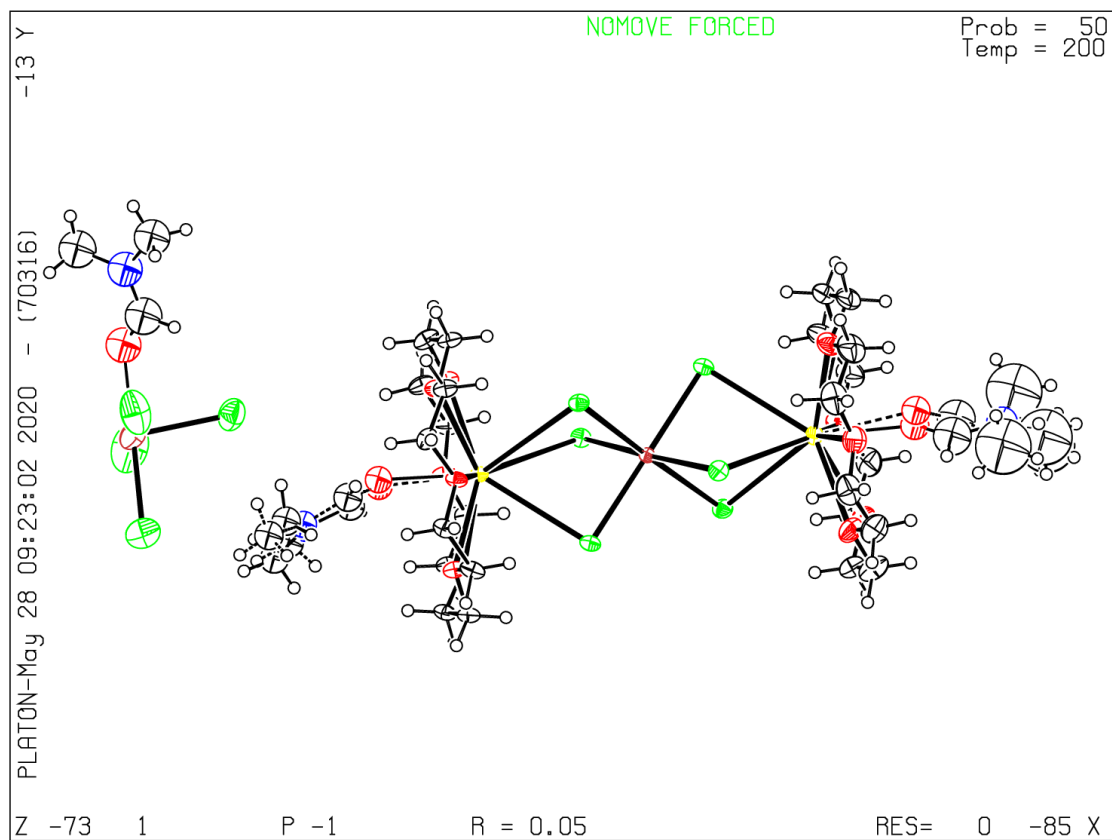

Supplement: Supplementary file 6 [file 23306120]
