# Supplementary material
Source: publisher figshare collection journal article supplement (https://acs.figshare.com/ndownloader/files/23306120)

# checkCIF/PLATON report

Structure factors have been supplied for datablock(s) 1

THIS REPORT IS FOR GUIDANCE ONLY. IF USED AS PART OF A REVIEW PROCEDURE FOR PUBLICATION, IT SHOULD NOT REPLACE THE EXPERTISE OF AN EXPERIENCED CRYSTALLOGRAPHIC REFEREE.

No syntax errors found.      CIF dictionary      Interpreting this report

## Datablock: 1

---

Bond precision:    C-C = 0.0048 Å

Wavelength=0.71073

Cell:                a=10.3975(5)                b=10.4680(6)                c=11.1155(6)  
                      alpha=81.237(5)        beta=80.582(4)        gamma=82.112(4)  
Temperature:        230 K

|                        | Calculated                                                    | Reported                                      |
|------------------------|---------------------------------------------------------------|-----------------------------------------------|
| Volume                 | 1171.73(11)                                                   | 1171.73(11)                                   |
| Space group            | P -1                                                          | P -1                                          |
| Hall group             | -P 1                                                          | -P 1                                          |
| Moiety formula         | C24.67 H49.55 Cl5 N0.22<br>O12.22 Rb2 Sb, 1.778(C3 H7<br>N O) | Cl5 Sb, 2(Rb), 2(C12 H24<br>O6), 2(C3 H7 N O) |
| Sum formula            | C30 H62 Cl5 N2 O14 Rb2 Sb                                     | C30 H62 Cl5 N2 O14 Rb2 Sb                     |
| Mr                     | 1144.77                                                       | 1144.75                                       |
| Dx, g cm <sup>-3</sup> | 1.622                                                         | 1.622                                         |
| Z                      | 1                                                             | 1                                             |
| Mu (mm <sup>-1</sup> ) | 2.995                                                         | 2.995                                         |
| F000                   | 578.0                                                         | 578.0                                         |
| F000'                  | 576.51                                                        |                                               |
| h,k,lmax               | 15,15,16                                                      | 15,15,16                                      |
| Nref                   | 8642                                                          | 7718                                          |
| Tmin,Tmax              | 0.070,0.133                                                   | 0.135,0.166                                   |
| Tmin'                  | 0.036                                                         |                                               |

Correction method= # Reported T Limits: Tmin=0.135 Tmax=0.166  
AbsCorr = MULTI-SCAN

Data completeness= 0.893

Theta(max)= 32.753

R(reflections)= 0.0417( 5789)

wR2(reflections)= 0.0980( 7718)

S = 1.025

Npar= 231

---

The following ALERTS were generated. Each ALERT has the format

**test-name\_ALERT\_alert-type\_alert-level.**

Click on the hyperlinks for more details of the test.

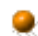

### Alert level B

CRYSS02\_ALERT\_3\_B The value of \_exptl\_crystal\_size\_min is > 0.6  
Minimum crystal size given = 0.673  
CRYSS02\_ALERT\_3\_B The value of \_exptl\_crystal\_size\_mid is > 0.8  
Mid crystal size given = 0.985

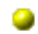

### Alert level C

PLAT202\_ALERT\_3\_C Isotropic non-H Atoms in Anion/Solvent ..... 5 Check  
O7 N1 C13 C14 C15  
PLAT906\_ALERT\_3\_C Large K Value in the Analysis of Variance ..... 2.383 Check  
PLAT934\_ALERT\_3\_C Number of (Iobs-Icalc)/Sigma(W) > 10 Outliers .. 1 Check  
PLAT977\_ALERT\_2\_C Check Negative Difference Density on H14E -0.31 eA-3

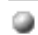

### Alert level G

PLAT004\_ALERT\_5\_G Polymeric Structure Found with Maximum Dimension 1 Info  
PLAT042\_ALERT\_1\_G Calc. and Reported MoietyFormula Strings Differ Please Check  
PLAT063\_ALERT\_4\_G Crystal Size Possibly too Large for Beam Size .. 1.00 mm  
PLAT171\_ALERT\_4\_G The CIF-Embedded .res File Contains EADP Records 4 Report  
PLAT232\_ALERT\_2\_G Hirshfeld Test Diff (M-X) Sb1 --Cl1 . 12.3 s.u.  
PLAT232\_ALERT\_2\_G Hirshfeld Test Diff (M-X) Sb1 --Cl2 . 15.0 s.u.  
PLAT232\_ALERT\_2\_G Hirshfeld Test Diff (M-X) Sb1 --Cl3 . 23.4 s.u.  
PLAT300\_ALERT\_4\_G Atom Site Occupancy of Cl3 Constrained at 0.5 Check  
PLAT301\_ALERT\_3\_G Main Residue Disorder .....(Resd 1 ) 5% Note  
PLAT302\_ALERT\_4\_G Anion/Solvent/Minor-Residue Disorder (Resd 2 ) 100% Note  
PLAT302\_ALERT\_4\_G Anion/Solvent/Minor-Residue Disorder (Resd 3 ) 100% Note  
PLAT380\_ALERT\_4\_G Incorrectly? Oriented X(sp2)-Methyl Moiety ..... C14 Check  
PLAT380\_ALERT\_4\_G Incorrectly? Oriented X(sp2)-Methyl Moiety ..... C15 Check  
PLAT780\_ALERT\_1\_G Coordinates do not Form a Properly Connected Set Please Do !  
PLAT789\_ALERT\_4\_G Atoms with Negative \_atom\_site\_disorder\_group # 36 Check  
PLAT811\_ALERT\_5\_G No ADDSYM Analysis: Too Many Excluded Atoms .... ! Info  
PLAT860\_ALERT\_3\_G Number of Least-Squares Restraints ..... 1 Note  
PLAT910\_ALERT\_3\_G Missing # of FCF Reflection(s) Below Theta(Min). 1 Note  
PLAT912\_ALERT\_4\_G Missing # of FCF Reflections Above STh/L= 0.600 922 Note  
PLAT933\_ALERT\_2\_G Number of OMIT Records in Embedded .res File ... 1 Note  
PLAT941\_ALERT\_3\_G Average HKL Measurement Multiplicity ..... 1.9 Low  
PLAT978\_ALERT\_2\_G Number C-C Bonds with Positive Residual Density. 1 Info

0 **ALERT level A** = Most likely a serious problem - resolve or explain  
2 **ALERT level B** = A potentially serious problem, consider carefully  
4 **ALERT level C** = Check. Ensure it is not caused by an omission or oversight  
22 **ALERT level G** = General information/check it is not something unexpected

2 ALERT type 1 CIF construction/syntax error, inconsistent or missing data  
6 ALERT type 2 Indicator that the structure model may be wrong or deficient  
9 ALERT type 3 Indicator that the structure quality may be low  
9 ALERT type 4 Improvement, methodology, query or suggestion  
2 ALERT type 5 Informative message, check

It is advisable to attempt to resolve as many as possible of the alerts in all categories. Often the minor alerts point to easily fixed oversights, errors and omissions in your CIF or refinement strategy, so attention to these fine details can be worthwhile. In order to resolve some of the more serious problems it may be necessary to carry out additional measurements or structure refinements. However, the purpose of your study may justify the reported deviations and the more serious of these should normally be commented upon in the discussion or experimental section of a paper or in the "special\_details" fields of the CIF. checkCIF was carefully designed to identify outliers and unusual parameters, but every test has its limitations and alerts that are not important in a particular case may appear. Conversely, the absence of alerts does not guarantee there are no aspects of the results needing attention. It is up to the individual to critically assess their own results and, if necessary, seek expert advice.

### **Publication of your CIF in IUCr journals**

A basic structural check has been run on your CIF. These basic checks will be run on all CIFs submitted for publication in IUCr journals (*Acta Crystallographica*, *Journal of Applied Crystallography*, *Journal of Synchrotron Radiation*); however, if you intend to submit to *Acta Crystallographica Section C* or *E* or *IUCrData*, you should make sure that full publication checks are run on the final version of your CIF prior to submission.

### **Publication of your CIF in other journals**

Please refer to the *Notes for Authors* of the relevant journal for any special instructions relating to CIF submission.

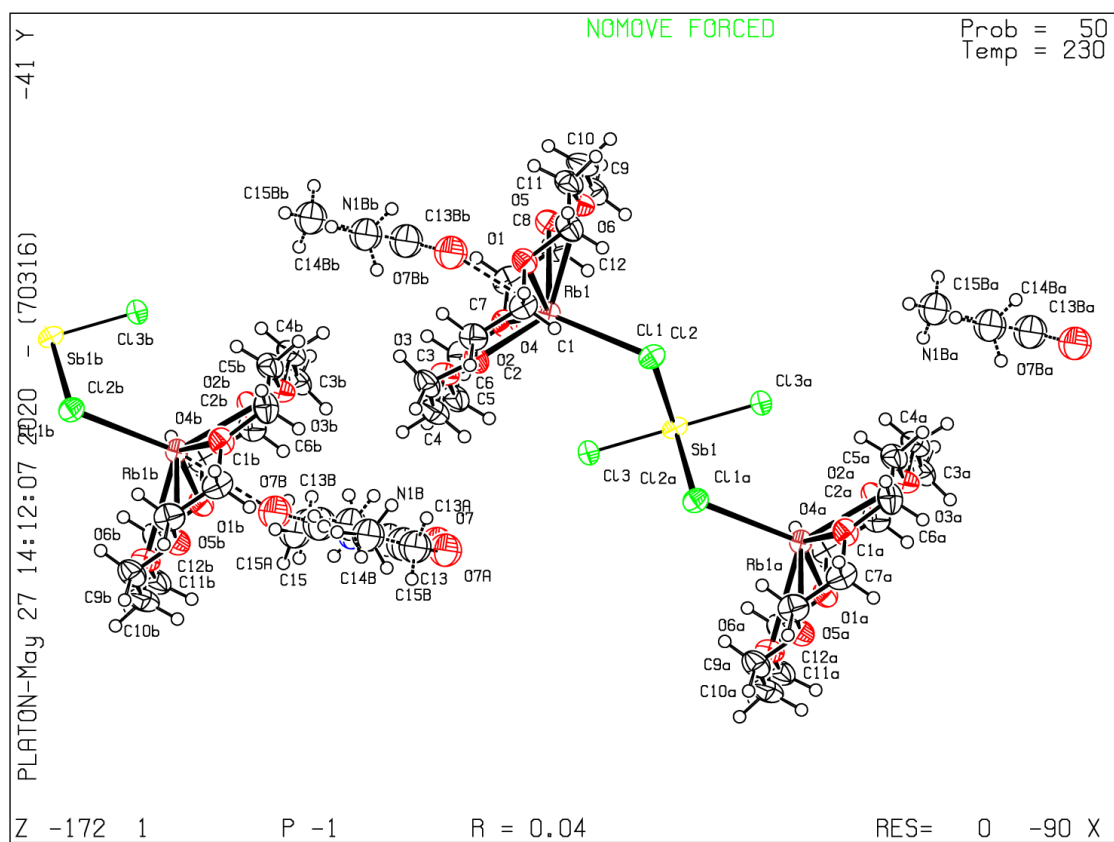

Supplement: Supplementary file 8 [file 23306120]
